# Supplementary material for: Single-cell Tsc1 knockout during corticogenesis generates tuber-like lesions and reduces seizure threshold in mice
Source: JCI journal article supplement (doi:10.1172/jci44909), 2011-03-14
Supplement: sd1 [file 1]

Supplemental Figure 1, Feliciano

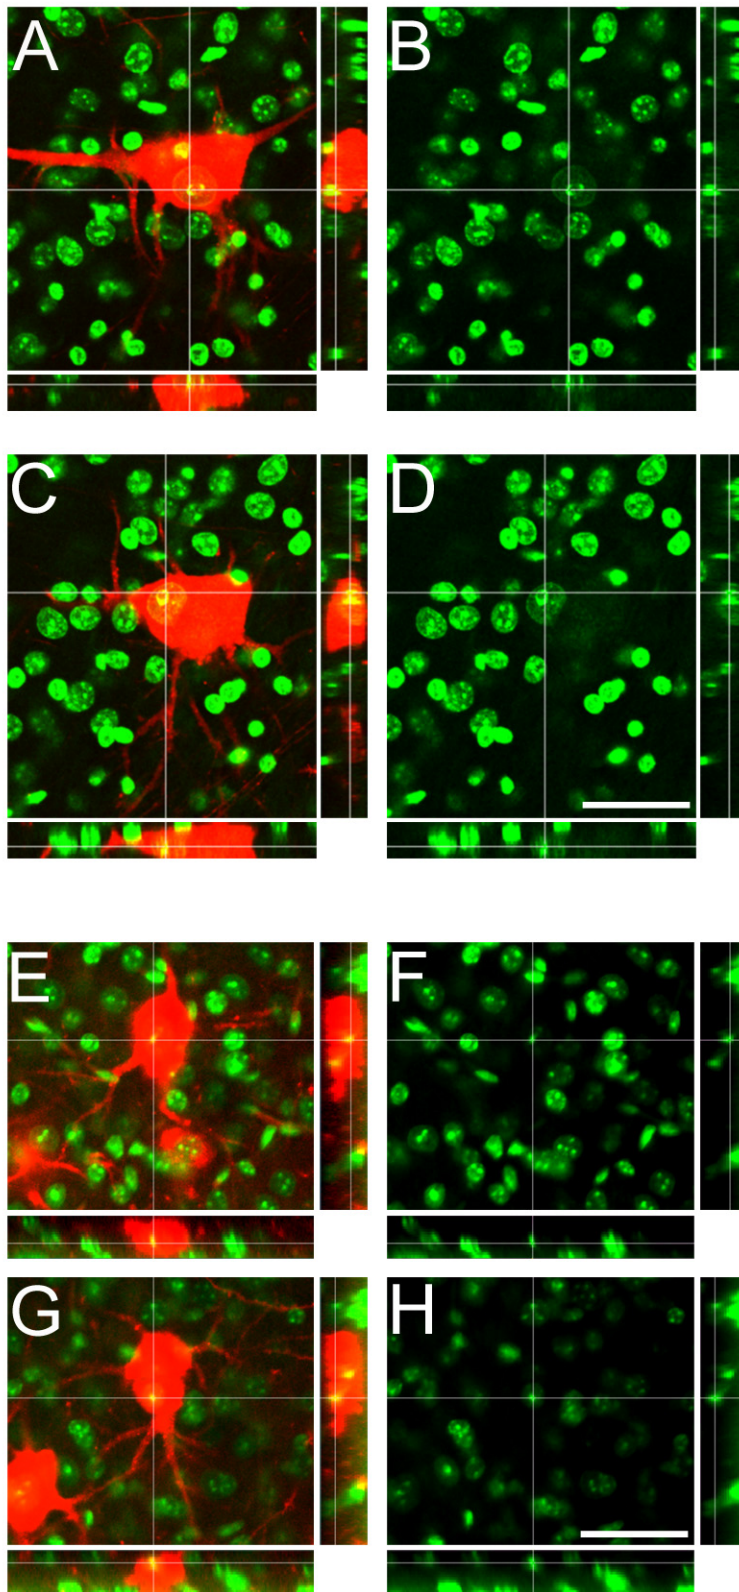

**Supplemental Figure 1. Examples of binucleated neurons.** (A-H) Confocal photographs and projections of a mRFP<sup>+</sup> cell (red) and DAPI (pseudo-colored green) in (A,C,E and G) and DAPI only (B,D,F, and H)). Each image is a single optical section (1  $\mu\text{m}$ ). All the images are from P28 *Tsc1*<sup>fl/mut</sup> mice electroporated at E15. Scale bars: 50  $\mu\text{m}$ .
